# Supplementary material
Source: publisher figshare collection journal article supplement (https://adisjournals.figshare.com/ndownloader/files/34481114)
Supplement: Supplementary file 1 [file 34481114]

Please note that this summary only contains information from the full scientific article:

[View Scientific Article](#)

# Using a pre-filled pen to inject an adalimumab biosimilar in people with rheumatoid arthritis

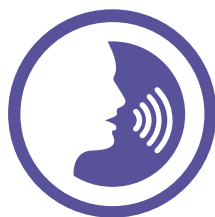

**Adalimumab**

<ada-LIM-yoo-mab>

**Biosimilar**

<BY-oh-SIH-mih-ler>

**Cytokine**

<SY-toh-kine>

**Methotrexate**

<MEH-thoh-TREK-sayt>

**Rheumatoid arthritis**

<ROO-muh-TOYD ar-THRY-tis>

**Tumor necrosis factor alpha**

<TOO-mer neh-KROH-sis FAK-ter AL-fuh>

**Date of summary:** December 2021

**Study number:** NCT02480153

**Study start date:** June 2015

**Study end date:** December 2017

**The full title of this article:** Usability study of PF-06410293, an adalimumab biosimilar, by prefilled pen: open-label, single-arm, sub-study of a phase 3 trial in patients with rheumatoid arthritis

**The purpose of this plain language summary is to help you to understand the findings from recent research.**

- Adalimumab and the adalimumab biosimilar PF-06410293 are approved to treat the condition under study that is discussed in this summary.
- The results of this study may differ from those of other studies. Health professionals should make treatment decisions based on all available evidence not on the results of a single study.

**More information can be found in the scientific article of this study, which you can access here: [View Scientific Article](#)**

## What did this study look at?

- This study looked at how successful people were at injecting the adalimumab biosimilar medicine PF-06410293 using a pre-filled pen, which researchers developed to offer patients more convenience.

## What is rheumatoid arthritis?

- Rheumatoid arthritis is an autoimmune disease that causes pain, swelling, and stiffness in people's joints.
  - In people with rheumatoid arthritis, the immune system (the body's own defense cells) attacks the lining that surrounds their own joints.
  - Over time the cartilage and bones in the joint can become damaged. This can make it hard and/or painful to perform daily activities.
    - Cartilage is a type of connective tissue that is flexible.
  - The hands, feet, and wrists are often affected.

## How is rheumatoid arthritis treated?

- People with rheumatoid arthritis often take methotrexate, which works by blocking the immune system to reduce inflammation.
- If people's rheumatoid arthritis does not improve with methotrexate, they may also take adalimumab.
  - Adalimumab is a type of biological medicine. It is made from proteins produced naturally by the body.

## Additional information

For more information on this study, please visit:

[View Scientific Article](#)

<https://clinicaltrials.gov/ct2/show/NCT02480153?term=NCT02480153&draw=2&rank=1>

For more information on clinical studies in general, please visit:

<https://www.clinicaltrials.gov/ct2/about-studies/learn>

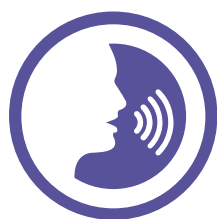

**Adalimumab**  
<ada-LIM-yoo-mab>

**Biosimilar**  
<BY-oh-SIH-mih-ler>

**Cytokine**  
<SY-toh-kine>

**Methotrexate**  
<MEH-thoh-TREK-sayt>

**Rheumatoid arthritis**  
<ROO-muh-TOYD ar-THRY-tis>

**Tumor necrosis factor alpha**  
<TOO-mer neh-KROH-sis FAK-ter  
AL-fuh>

- Adalimumab works by blocking the activity of a cytokine called tumor necrosis factor alpha (TNF $\alpha$  for short), which is released by immune cells and causes inflammation.
  - Cytokines are proteins that gather immune cells to areas of infection, inflammation, and damage.
- In rheumatoid arthritis, immune cells continue to release TNF $\alpha$ , which causes long-lasting joint inflammation. This can cause painful symptoms.
  - Adalimumab binds to TNF $\alpha$  and stops it from signaling to other immune cells. This reduces inflammation and can reduce painful symptoms.

### What are biosimilar medicines?

- Biosimilar medicines are very similar to biological medicines already used by doctors but are less expensive and may increase access to these treatments.
  - Biosimilars are carefully tested to make sure they work as well as biologics and are as safe before they can be used as medicines.
- In a previous study, researchers showed that a biosimilar of adalimumab, known as PF-06410293, was just as safe and effective for treating rheumatoid arthritis.

### How do people take adalimumab and PF-06410293?

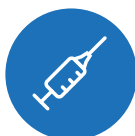

People take adalimumab and PF-06410293 by injecting it under the skin into their stomach area using a pre-filled syringe, similar to how people with diabetes inject insulin.

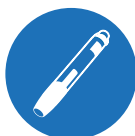

Researchers have developed a pre-filled pen to make it easier for people with rheumatoid arthritis to take adalimumab and PF-06410293. Pre-filled pens are single-use and disposable.

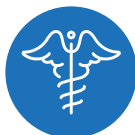

In a previous study, researchers showed that adalimumab or PF-06410293 was as safe and effective at treating rheumatoid arthritis in people who changed from a pre-filled syringe to a pre-filled pen.

### What was the aim of this study?

- In this study, researchers looked at how successful people were at injecting PF-06410293 using a pre-filled pen.
  - Researchers developed pre-filled pens to offer patients more convenience.
- Researchers measured the successful use of the pre-filled pen by calculating the delivery system success rate.
  - People can check a small window on the pre-filled pen to see if they have used the pre-filled pen successfully.
  - If the blue bar has moved across the window, then they successfully used the pre-filled pen.

Before use or unsuccessful use

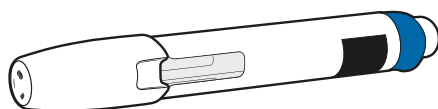

Successful use

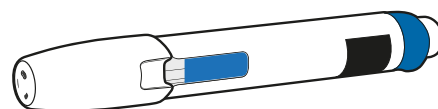

- Users filled out a questionnaire to report if the injection was successful.
- Then, researchers work out the percentage of people who successfully used the pre-filled pen.
- Researchers also looked at the side effects that people with rheumatoid arthritis had when taking ADL-PF using the pre-filled pen.
  - A side effect is something (expected or unexpected) that you feel was caused by a medicine or treatment you take.

## Additional information

For more information on this study, please visit:

[View Scientific Article](#)

<https://clinicaltrials.gov/ct2/show/NCT02480153?term=NCT02480153&draw=2&rank=1>

For more information on clinical studies in general, please visit:

<https://www.clinicaltrials.gov/ct2/about-studies/learn>



**Adalimumab**  
<ada-LIM-yoo-mab>

**Biosimilar**  
<BY-oh-SIH-mih-ler>

**Cytokine**  
<SY-toh-kine>

**Methotrexate**  
<MEH-thoh-TREK-sayt>

**Rheumatoid arthritis**  
<ROO-muh-TOYD ar-THRY-tis>

**Tumor necrosis factor alpha**  
<TOO-mer neh-KROH-sis FAK-ter  
AL-fuh>

## Where is this study in the drug development timeline?

- This was a sub-study of a larger three-part phase 3 clinical trial that compared the safety and effectiveness of PF-06410293 with adalimumab made in the European Union.
  - A phase 3 clinical trial is a large study (up to thousands of patients) that is long in duration (1–4 years). It looks at how safe a new treatment is and how well it works compared with a standard treatment.
- People could choose to take part in this study if they were already taking part in the larger phase 3 clinical trial.

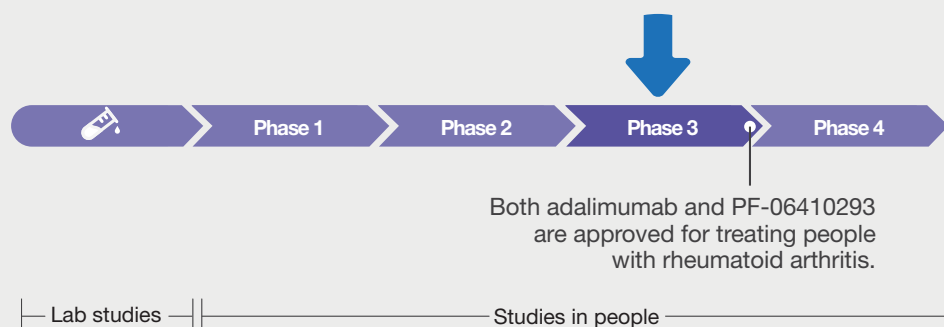

## Who took part in this study and what did they have to do?

### Sub-study (weeks 52–66)

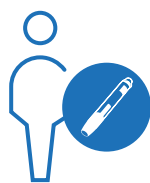

**PF-06410293**  
(adalimumab  
biosimilar)

- After taking part in a 1-year clinical trial, 50 people with rheumatoid arthritis from the United States, Czech Republic, Lithuania, and Poland volunteered for an additional sub-study.
- People with rheumatoid arthritis or their caregivers had training to help them use the pre-filled pen.
  - They injected 40 mg of PF-06410293 once every other week for 6 weeks using the pre-filled pen.
  - They also took 6 mg to 25 mg of methotrexate each week.
- People used the pre-filled pen at home or at the study center where researchers watched them.

## Additional information

For more information on this study, please visit:

[View Scientific Article](#)

<https://clinicaltrials.gov/ct2/show/NCT02480153?term=NCT02480153&draw=2&rank=1>

For more information on clinical studies in general, please visit:

<https://www.clinicaltrials.gov/ct2/about-studies/learn>

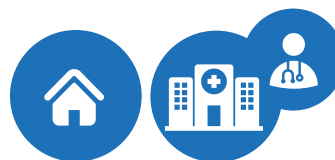

Weeks

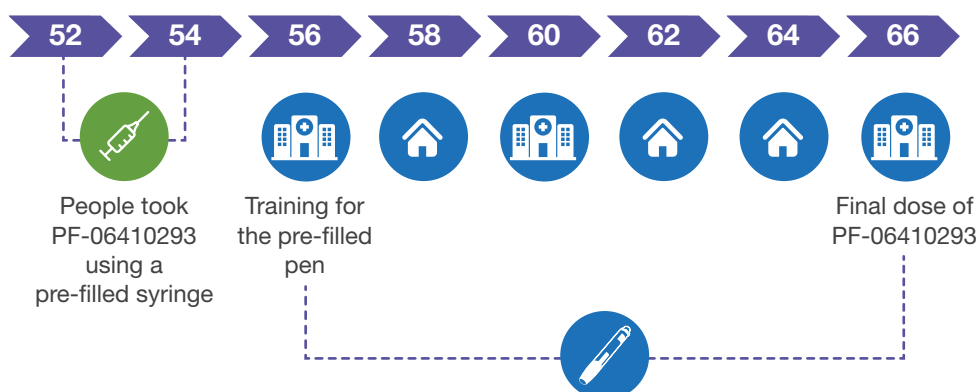

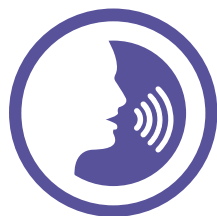

**Adalimumab**  
<ada-LIM-yoo-mab>

**Biosimilar**  
<BY-oh-SIH-mih-ler>

**Cytokine**  
<SY-toh-kine>

**Methotrexate**  
<MEH-thoh-TREK-sayt>

**Rheumatoid arthritis**  
<ROO-muh-TOYD ar-THRY-tis>

**Tumor necrosis factor alpha**  
<TOO-mer neh-KROH-sis FAK-ter  
AL-fuh>

- On average, the people in this study were 54 years old.
  - Around 70% were female.
  - About 90% were right-handed.
  - On average, they had been living with rheumatoid arthritis for 8 years.
- No one in the study had previously used a pre-filled pen.
- People could continue using the pre-filled pen after the sub-study ended until the end of the phase 3 clinical trial (week 78) if they chose to.
- Researchers monitored people's rheumatoid arthritis during the study.

## What were the results of the study?

### How successful were people at using the prefilled-pen to inject PF-06410293?

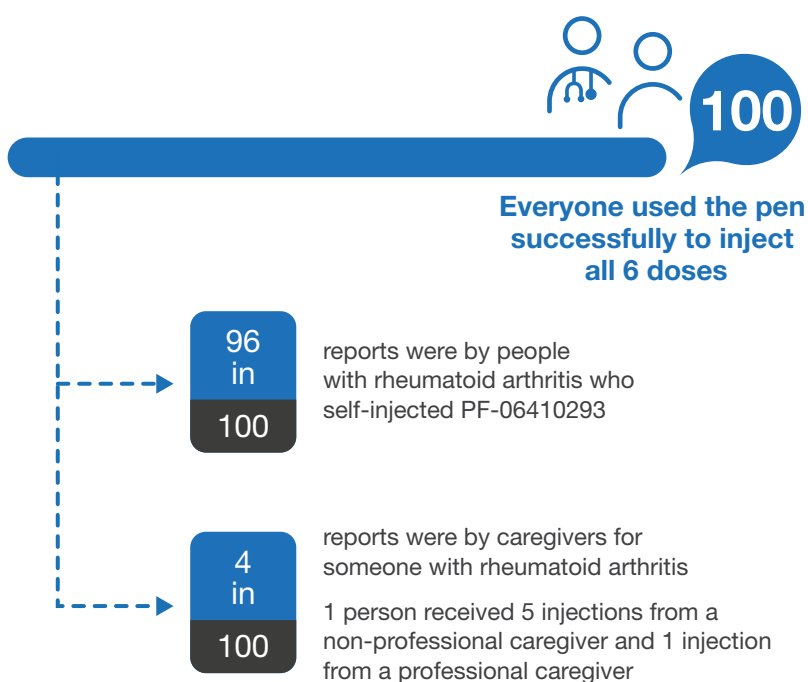

This means that the delivery system success rate score was

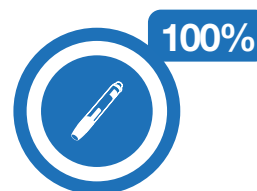

## Additional information

For more information on this study, please visit:

[View Scientific Article](#)

<https://clinicaltrials.gov/ct2/show/NCT02480153?term=NCT02480153&draw=2&rank=1>

For more information on clinical studies in general, please visit:

<https://www.clinicaltrials.gov/ct2/about-studies/learn>

### What were the side effects of treatment?

- Researchers looked at how many people had side effects after treatment.
  - A side effect is considered “serious” when it is life-threatening, needs hospital care, or causes lasting problems.
  - The side effects could be for any reason and may not be due to taking the study drug.
  - Researchers looked at side effects in everyone who took at least part of one dose of PF-06410293 using a pre-filled pen.



**Adalimumab**  
<ada-LIM-yoo-mab>

**Biosimilar**  
<BY-oh-SIH-mih-ler>

**Cytokine**  
<SY-toh-kine>

**Methotrexate**  
<MEH-thoh-TREK-sayt>

**Rheumatoid arthritis**  
<ROO-muh-TOYD ar-THRY-tis>

**Tumor necrosis factor alpha**  
<TOO-mer neh-KROH-sis FAK-ter  
AL-fuh>

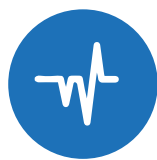

No one died  
during this  
sub-study

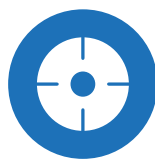

No one had a  
reaction at the  
site of injection

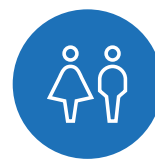

No one left the study or  
stopped treatment  
because of side effects

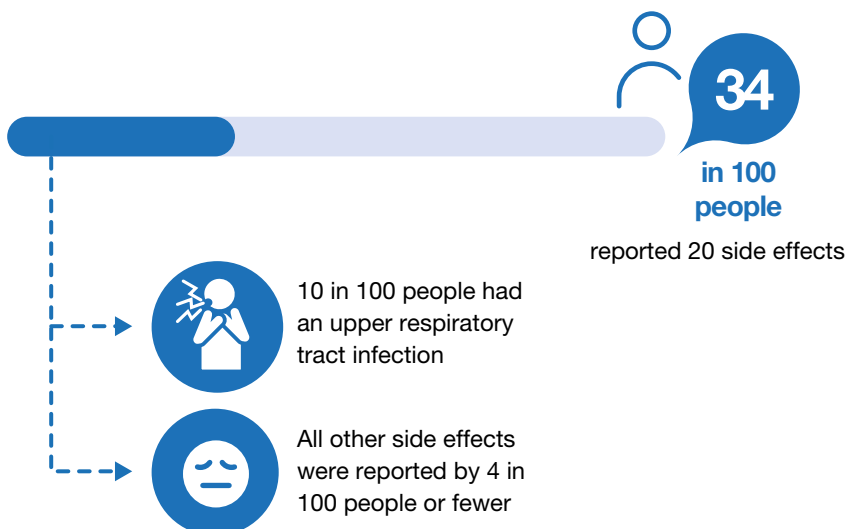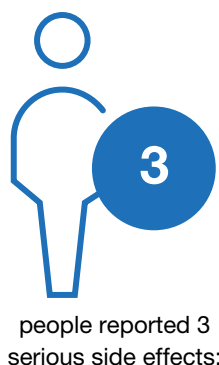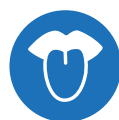

1 person  
had tonsillitis

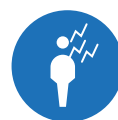

1 person had  
rheumatoid arthritis  
that worsened

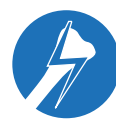

1 person  
fractured their  
pelvis

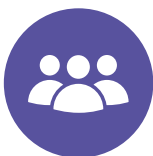

Side effects of this sub study were similar to those  
reported in the overall clinical trial

## Additional information

For more information on this  
study, please visit:

[View Scientific Article](#)

[https://clinicaltrials.gov/ct2/  
show/NCT02480153?term=  
NCT02480153&draw=2&rank=1](https://clinicaltrials.gov/ct2/show/NCT02480153?term=NCT02480153&draw=2&rank=1)

For more information on  
clinical studies in general,  
please visit:

[https://www.clinicaltrials.gov/  
ct2/about-studies/learn](https://www.clinicaltrials.gov/ct2/about-studies/learn)

## How many people continued using the pre-filled pen to inject PF-06410293 when the sub-study finished?

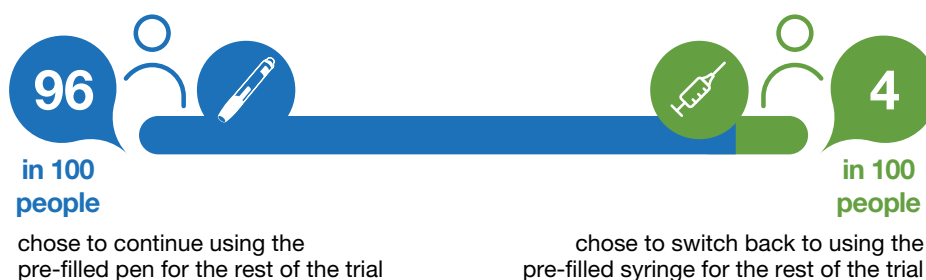

More results from this study can be found here: [View Scientific Article](#)

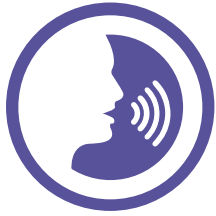

**Adalimumab**  
<ada-LIM-yoo-mab>

**Biosimilar**  
<BY-oh-SIH-mih-ler>

**Cytokine**  
<SY-toh-kine>

**Methotrexate**  
<MEH-thoh-TREK-sayt>

**Rheumatoid arthritis**  
<ROO-muh-TOYD ar-THRY-tis>

**Tumor necrosis factor alpha**  
<TOO-mer neh-KROH-sis FAK-ter  
AL-fuh>

## What were the main conclusions reported by the researchers?

- These findings suggest that people with rheumatoid arthritis and their caregivers can safely and effectively inject PF-06410293 using a pre-filled pen.
- Side effects in people with rheumatoid arthritis using a pre-filled pen to inject PF-06410293 were similar to those in people with rheumatoid arthritis using a pre-filled syringe.
- Most people chose to continue injecting PF-06410293 using a pre-filled pen instead of a pre-filled syringe for the rest of the clinical trial.
- Researchers could not be certain
  - how well people injecting PF-06410293 using a pre-filled pen would have responded without previous experience using a pre-filled syringe.
  - that people with rheumatoid arthritis would receive similar training on how to use the pre-filled pen in a real-world setting.

## Are there any plans for further studies?

- There are currently no plans for further studies of PF-06410293 using a pre-filled pen.

## Who sponsored this study?

Pfizer Inc.

235 East 42nd Street, NY, NY 10017

Phone (United States): +1 212-733-2323

**Pfizer would like to thank all of the people who took part in this study.**

### Acknowledgements

Writing support was provided by Jake Evans, PhD, and Elyse Smith, PhD, Engage Scientific Solutions, and was funded by Pfizer.

## Additional information

For more information on this study, please visit:

[View Scientific Article](#)

<https://clinicaltrials.gov/ct2/show/NCT02480153?term=NCT02480153&draw=2&rank=1>

For more information on clinical studies in general, please visit:

<https://www.clinicaltrials.gov/ct2/about-studies/learn>

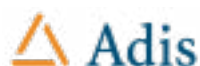

The graphical PLS represents the opinions of the authors. For a full list of declarations, including funding and author disclosure statements, please see the full text online.  
© The authors, CC-BY-NC 2021.
